# Supplementary material
Source: publisher figshare collection journal article supplement (https://frontiersin.figshare.com/ndownloader/files/24257120)
Supplement: Supplementary file 1 [file 24257120]

## *Supplementary Material*

### **New Ecological Paradigm (NEP) (Whitmarsh, 2011 as adapted from Dunlap & Van Liere, 1978)**

The NEP is comprised of six statements to which participants indicate their level of agreement using a 5-point Likert scale ranging from strongly disagree to strongly agree.

*Humans have the right to modify the natural environment to suit their needs.*

*Humans are severely abusing the environment.*

*Plants and animals have as much right to exist as humans.*

*The balance of nature is strong enough to cope with the impacts of modern industrial nations.*

*Humans were meant to rule over the rest of nature.*

*The balance of nature is very delicate and easily upset.*

(Statements 1, 4 and 5 are reverse coded for analysis purposes)

**Binning criteria/codebook for open response question on opinions about consuming cultured meat**

| <b>Category</b> | <b>Qualifiers</b>                                                                                                                                                                                                                                                                                    | <b>Example</b>                                                                                                                                                                                         |
|-----------------|------------------------------------------------------------------------------------------------------------------------------------------------------------------------------------------------------------------------------------------------------------------------------------------------------|--------------------------------------------------------------------------------------------------------------------------------------------------------------------------------------------------------|
| Animal Welfare  | Respondents opinions reference benefits for animals; reduced animal cruelty/harm; reduced impact of slaughterhouses                                                                                                                                                                                  | "I think it's a great alternative to the killing of animals"                                                                                                                                           |
| Environment     | Respondents opinions reference environmental benefits of cultured meat; environmental impact of cultured meat; mentions sustainability of cultured meat                                                                                                                                              | "I would 100% try it, I believe it will be very beneficial to the environment and the future of the earth"<br><br>"It's not good for you or the environment"                                           |
| Naturalness     | Respondents opinions reference unnaturalness of cultured meat; negative views on production method; distaste of modified food/GMOs; availability of more natural alternatives; mention of chemicals; mention of "real meat"; mentions the word natural or unnatural; refers to cultured meat as fake | "I think it's unnatural and probably harmful to humans"<br><br>"Would prefer to know long-term effects of consuming GMO's like this before turning to it as my only meat source"                       |
| Health          | Respondents opinions reference the nutritional value of cultured meat; questions how healthy cultured meat is; mentions health benefits/risks;                                                                                                                                                       | "If it...provides the same nutrition without harming the environment or population of animals I think it's a good idea"                                                                                |
| Taste           | Respondents opinions reference taste/texture of cultured meat; mentions wanting to sample cultured meat to examine how it tastes                                                                                                                                                                     | "Sounds interesting, but I wonder how the taste really compares"<br><br>"The idea sounds interesting and I would very much so like to sample this type of meat to test the difference between the two" |
| Cost            | Respondents opinions reference the cost of cultured meat; concerns about cost                                                                                                                                                                                                                        | "Could save a lot of animals if it were...cost effective"                                                                                                                                              |

|                       |                                                                                                                                                                                                           |                                                                                                                                                                                                                                                           |
|-----------------------|-----------------------------------------------------------------------------------------------------------------------------------------------------------------------------------------------------------|-----------------------------------------------------------------------------------------------------------------------------------------------------------------------------------------------------------------------------------------------------------|
| Want more information | Respondents reference on wanting more information; wanting more research done on cultured meat; questions about cultured meat                                                                             | “I think it sounds like a good idea, but further research on the effects of it on human health, short term and long term need to be studied”                                                                                                              |
| Other                 | Respondent does not fit into any of the above categories                                                                                                                                                  | “It is important for us to leave the ecosystems of bacteria fungi and plant cells in order for it to sustain, reproduce, and support itself”                                                                                                              |
| Generally Positive    | Respondents opinions were overall positive reaction/support for cultured meat; desire to try cultured meat                                                                                                | <p>“Interesting idea, very creative and potentially successful alternative to common meat”</p> <p>“The idea sounds interesting and I would very much so like to sample this type of meat to test the difference between the two”</p>                      |
| Generally Negative    | Respondent opinions were overall negative; complete rejection of cultured meat; confusion about cultured meat; indication that they would not consume cultured meat; indication of disgust/lack of appeal | “It seems rather disturbing to know that that is an option. It is something I never really knew existed. It is definitely not something that I look out for when considering a food option on a menu or buying it in store, nor do I think it ever will.” |

**The shortened Food Disgust Scale (Hartmann & Siegrist, 2018)**

The shortened Food Disgust Scale is comprised of eight statements to which participants indicate how disgusting each of the actions or situations indicated in the statements are to them (6-point scale with 1 anchored as not disgusting at all and 6 anchored as very disgusting).

*To put animal cartilage into my mouth.*

*To eat with dirty silverware in a restaurant.*

*Food donated from a neighbour whom I barely know.*

*To eat hard cheese from which mold was cut off.*

*To eat apple slices that turned brown when exposed to air.*

*The texture of some kinds of fish in the mouth.*

*To eat brown-coloured avocado pulp.*

*There is a little snail in the salad that I wanted to eat.*

### **The Food Neophobia Scale (Pliner & Hobden, 1992)**

The Food Neophobia scale is comprised of 10 statements to which participants rate their level of agreement (5-point Likert scale; strongly agree to strongly disagree).

*I am constantly sampling new and different food.*

*I don't trust new foods.*

*If I don't know what is in a food I won't try it.*

*I like food from different countries.*

*Ethnic foods look too weird to eat.*

*At dinner parties I will try new food.*

*I am afraid to eat things I have never had before.*

*I am very particular about the food I will eat.*

*I will eat almost anything.*

*I like to try new ethnic restaurants.*

(Statements 1, 4, 6, 9, & 10 are reverse coded for analysis purposes)

Distribution of NEP, Food Neophobia, and Food Disgust Scores

| <i>NEP SCORE</i>   |       |
|--------------------|-------|
| Mean               | 3.99  |
| Standard Error     | 0.04  |
| Median             | 4     |
| Mode               | 4.17  |
| Standard Deviation | 0.61  |
| Sample Variance    | 0.38  |
| Kurtosis           | -0.27 |
| Skewness           | -0.42 |
| Range              | 3.17  |
| Minimum            | 1.83  |
| Maximum            | 5     |

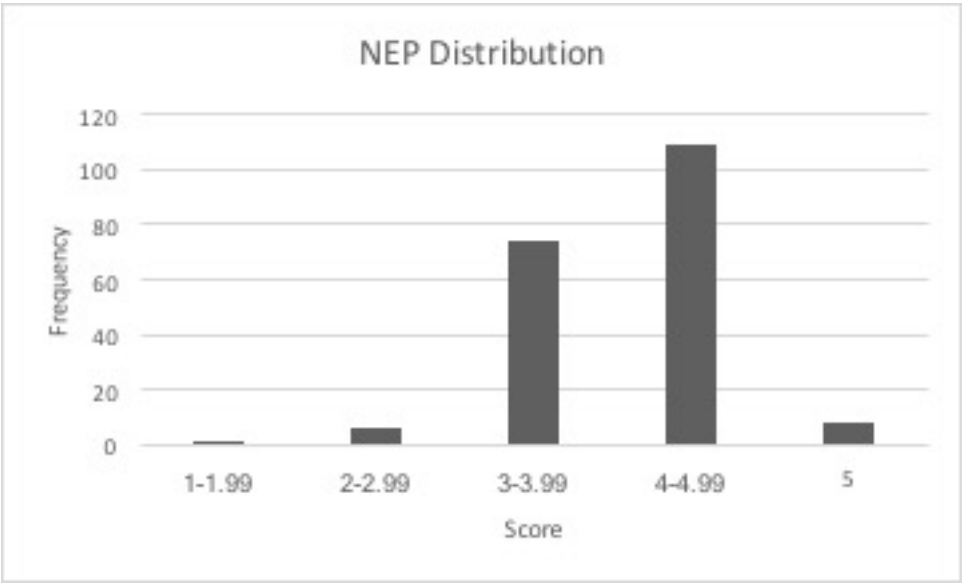

---

### *Neophobia Score*

---

|                    |       |
|--------------------|-------|
| Mean               | 24.19 |
| Standard Error     | 0.65  |
| Median             | 23    |
| Mode               | 23    |
| Standard Deviation | 9.11  |
| Sample Variance    | 82.92 |
| Kurtosis           | -0.48 |
| Skewness           | 0.51  |
| Range              | 39    |
| Minimum            | 10    |
| Maximum            | 49    |

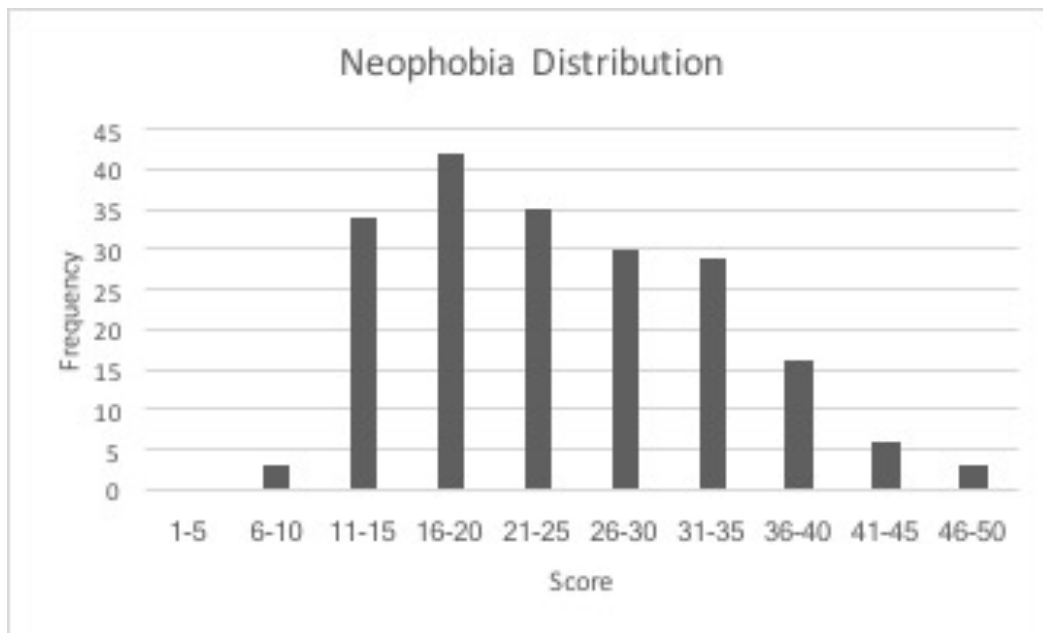

| <i>Food Disgust Score</i> |       |
|---------------------------|-------|
| Mean                      | 32.54 |
| Standard Error            | 0.51  |
| Median                    | 33    |
| Mode                      | 35    |
| Standard Deviation        | 7.16  |
| Sample Variance           | 51.32 |
| Kurtosis                  | -0.53 |
| Skewness                  | -0.09 |
| Range                     | 32    |
| Minimum                   | 16    |
| Maximum                   | 48    |

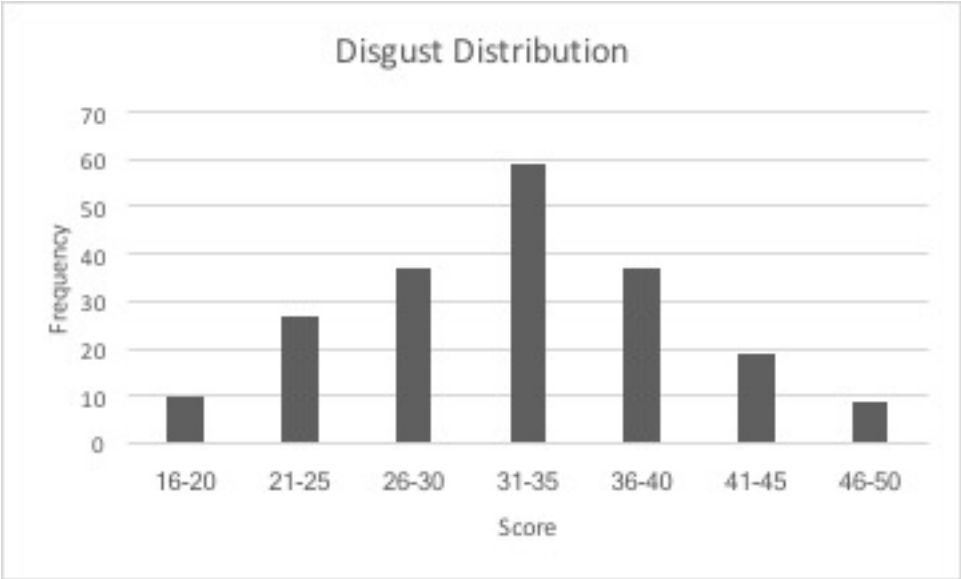



**Correlations (r) between predictor variables used to model initial intent to consumer cultured meat (CM) (regression analyses)**

|                         | Food disgust   | Food neophobia | New Ecological Paradigm |
|-------------------------|----------------|----------------|-------------------------|
| Food disgust            | -              | -              | -                       |
| Food neophobia          | <i>0.43***</i> | -              | -                       |
| New Ecological Paradigm | 0.06           | 0.01           | -                       |

\*\*\*  $p(r) < 0.001$

**Sample sizes for examination of group differences between participants who responded positively to messaging (showed increase in intent) and those who did not (no change in intent)**

Men (n=40) vs women (n=159)

- Men, increase in intent (n= 25)
- Women, increase in intent (n=104)
- Men, no change in intent (n= 15)
- Women, no change in intent (n=53)

Vegetarians/vegans (n=23) vs meat eaters (n=177)

- Veg, increase in intent (n=13)
- Meat eater, increase in intent (n=116)
- Veg, no change in intent (n=9)
- Meat eater, no change in intent (n=60)

Low meat consumers (n=159) vs high meat consumers (n=41)

- Low, increase in intent (n=61)
- High, increase in intent (n=12)
- Low, no change in intent (n=98)
- High, no change in intent (n=29)

Low NEP score (n=80) vs high NEP score (n=120)

- Low NEP, increase in intent (n=27)
- High NEP, increase in intent (n=46)
- Low NEP, no change in intent (n=53)
- High NEP, no change in intent (n=74)

Religion important (n=115) vs religion not important (n=85)

- Religion important, increase in intent (n=44)
- Religion not important, increase in intent (n=29)
- Religion important, no change in intent (n=71)
- Religion not important, no change in intent (n=56)

Liberals (n=96) vs conservatives (n=25)

- Liberals, increase in intent (n=32)
- Conservatives, increase in intent (n=7)
- Liberals, no change in intent (n=64)
- Conservatives, no change in intent (n=18)
